# Supplementary material
Source: Springer Nature journal article supplement (https://www.springermedizin.de/resource/supplementary/12889_2011_4372_MOESM1_ESM.pdf/9492236)
Supplement: MOESM1 [file 9492236]

**Search**

*Website of the French National Authority for Health*

*Medical devices only*

*Date of the public report between January 1, 2008 and December 31, 2008*

**Public documents**  
(n = 171)

*Public documents screened on basis of the type of medical device and the presence of an opinion*

**Included**  
(n=83 public documents),  
representing **102 opinions**

*Excluded (n=88)*

*Non-implantable medical devices: 69*

*IMDs public documents with no opinion: 18*

*Duplicate of IMD public document: 1*
